# Supplementary material for: In vitro and in vivo evaluation of the radiosensitizing effect of a selective FGFR inhibitor (JNJ-42756493) for rectal cancer
Source: Springer Nature journal article supplement (doi:10.1186/s12885-015-2000-8), 2015-12-01
Supplement: MOESM1 [file 9745786]

# Figure e1

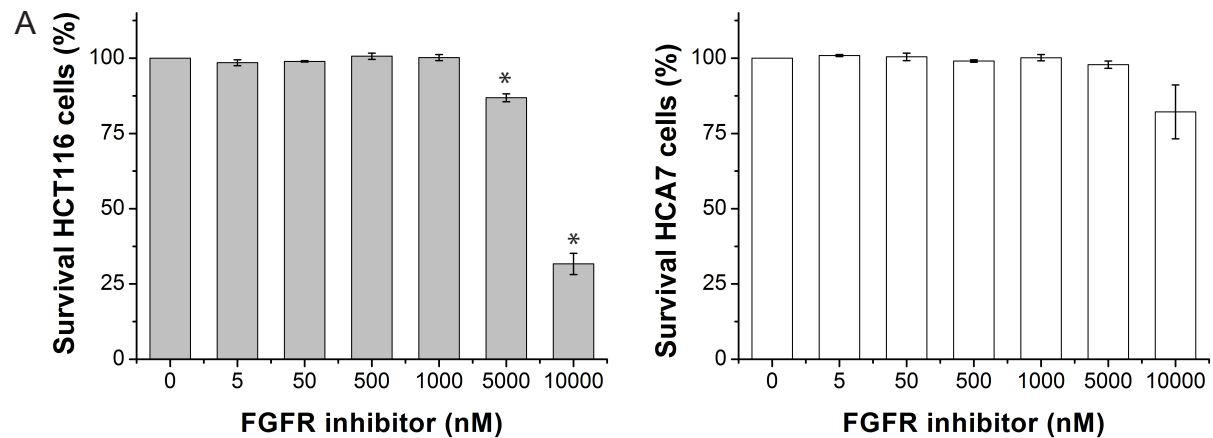

**B**

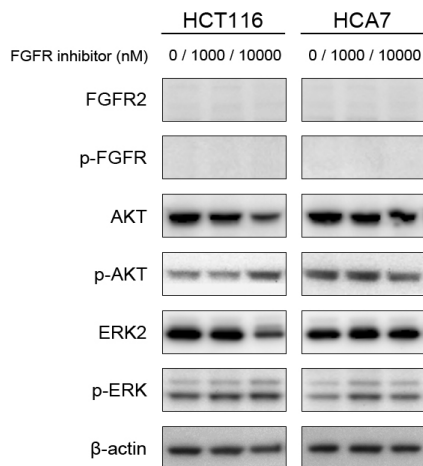

**Figure e1. Effect on cell survival and protein levels.** (A) Effect of different concentrations FGFR inhibitor for 72 hours incubation on cell survival determined by sulforhodamine B assay. Data = means  $\pm$  SEM from three independent experiments performed in triplicate. \*Significantly different from control conditions at the appropriate drug concentrations ( $p < 0.05$ ; Tukey). (B) Immunoblot analysis of FGFR2 and downstream signaling molecules after 72 hours treatment.  $\beta$ -actin was used as a loading control. Blots shown are representative for two independent experiments.
