# Supplementary material for: In vitro and in vivo evaluation of the radiosensitizing effect of a selective FGFR inhibitor (JNJ-42756493) for rectal cancer
Source: Springer Nature journal article supplement (doi:10.1186/s12885-015-2000-8), 2015-12-01
Supplement: MOESM2 [file 9745786]

# Figure e2

A

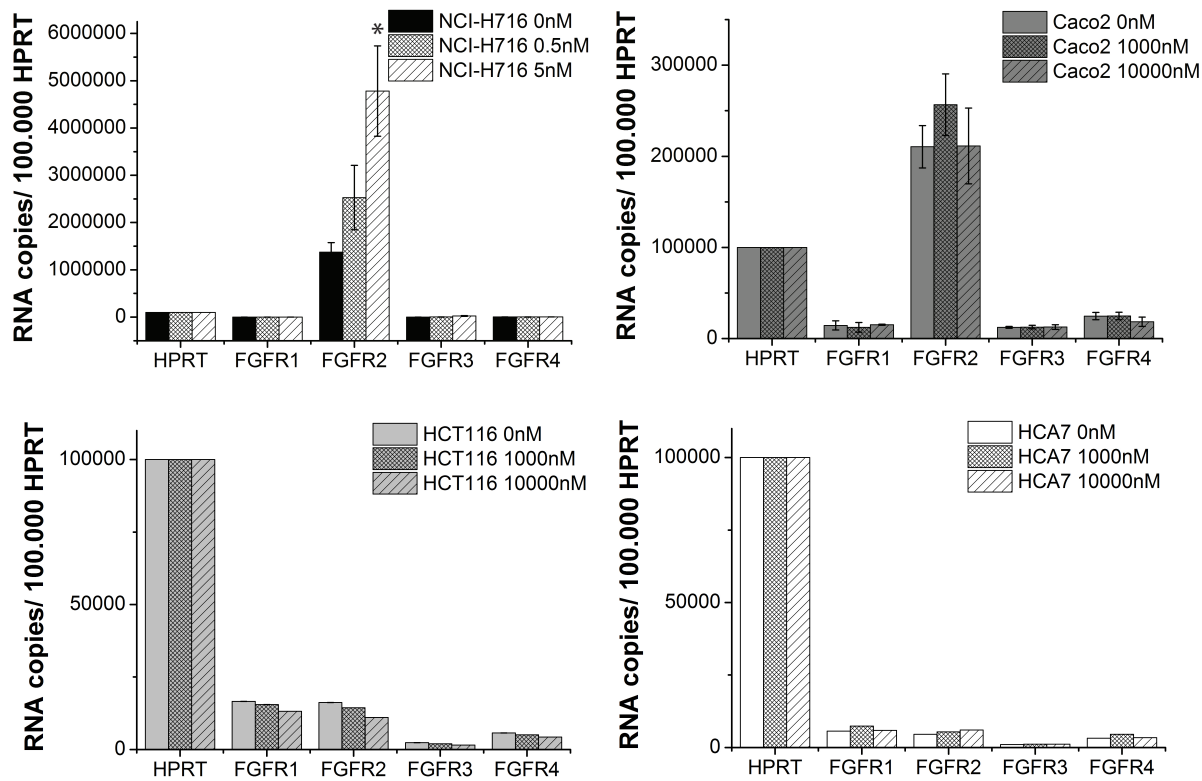

B

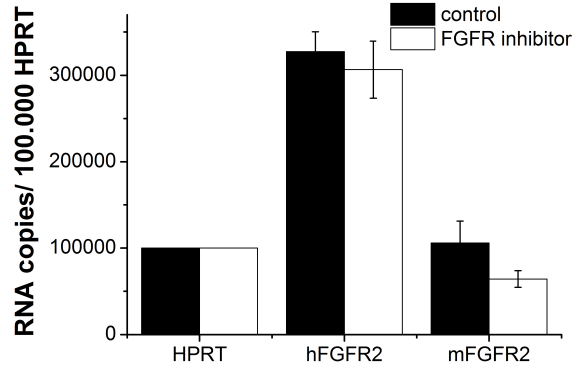

**Figure e2. Effect on FGFR mRNA levels.** (A) Quantification of FGFR mRNA expression in NCI-H716, Caco2, HCT116 and HCA7 cells after 72 hours drug incubation. Data = means  $\pm$  SEM of two independent experiments performed in duplicate. (B) Quantification of FGFR2 mRNA expression in NCI-H716 tumors isolated after drug treatment (TP1). Data = means  $\pm$  SEM of three independent experiments. HPRT copy number was used to normalize the data. \*Significantly different from control conditions at the appropriate drug concentrations ( $p < 0.05$ ; Tukey).
